# Supplementary material
Source: Springer Nature journal article supplement (https://www.springermedizin.de/resource/supplementary/13013_2008_130_MOESM1_ESM.pdf/9631286)

- AIS
- EOS
- CS
- DS
- other
- Ky

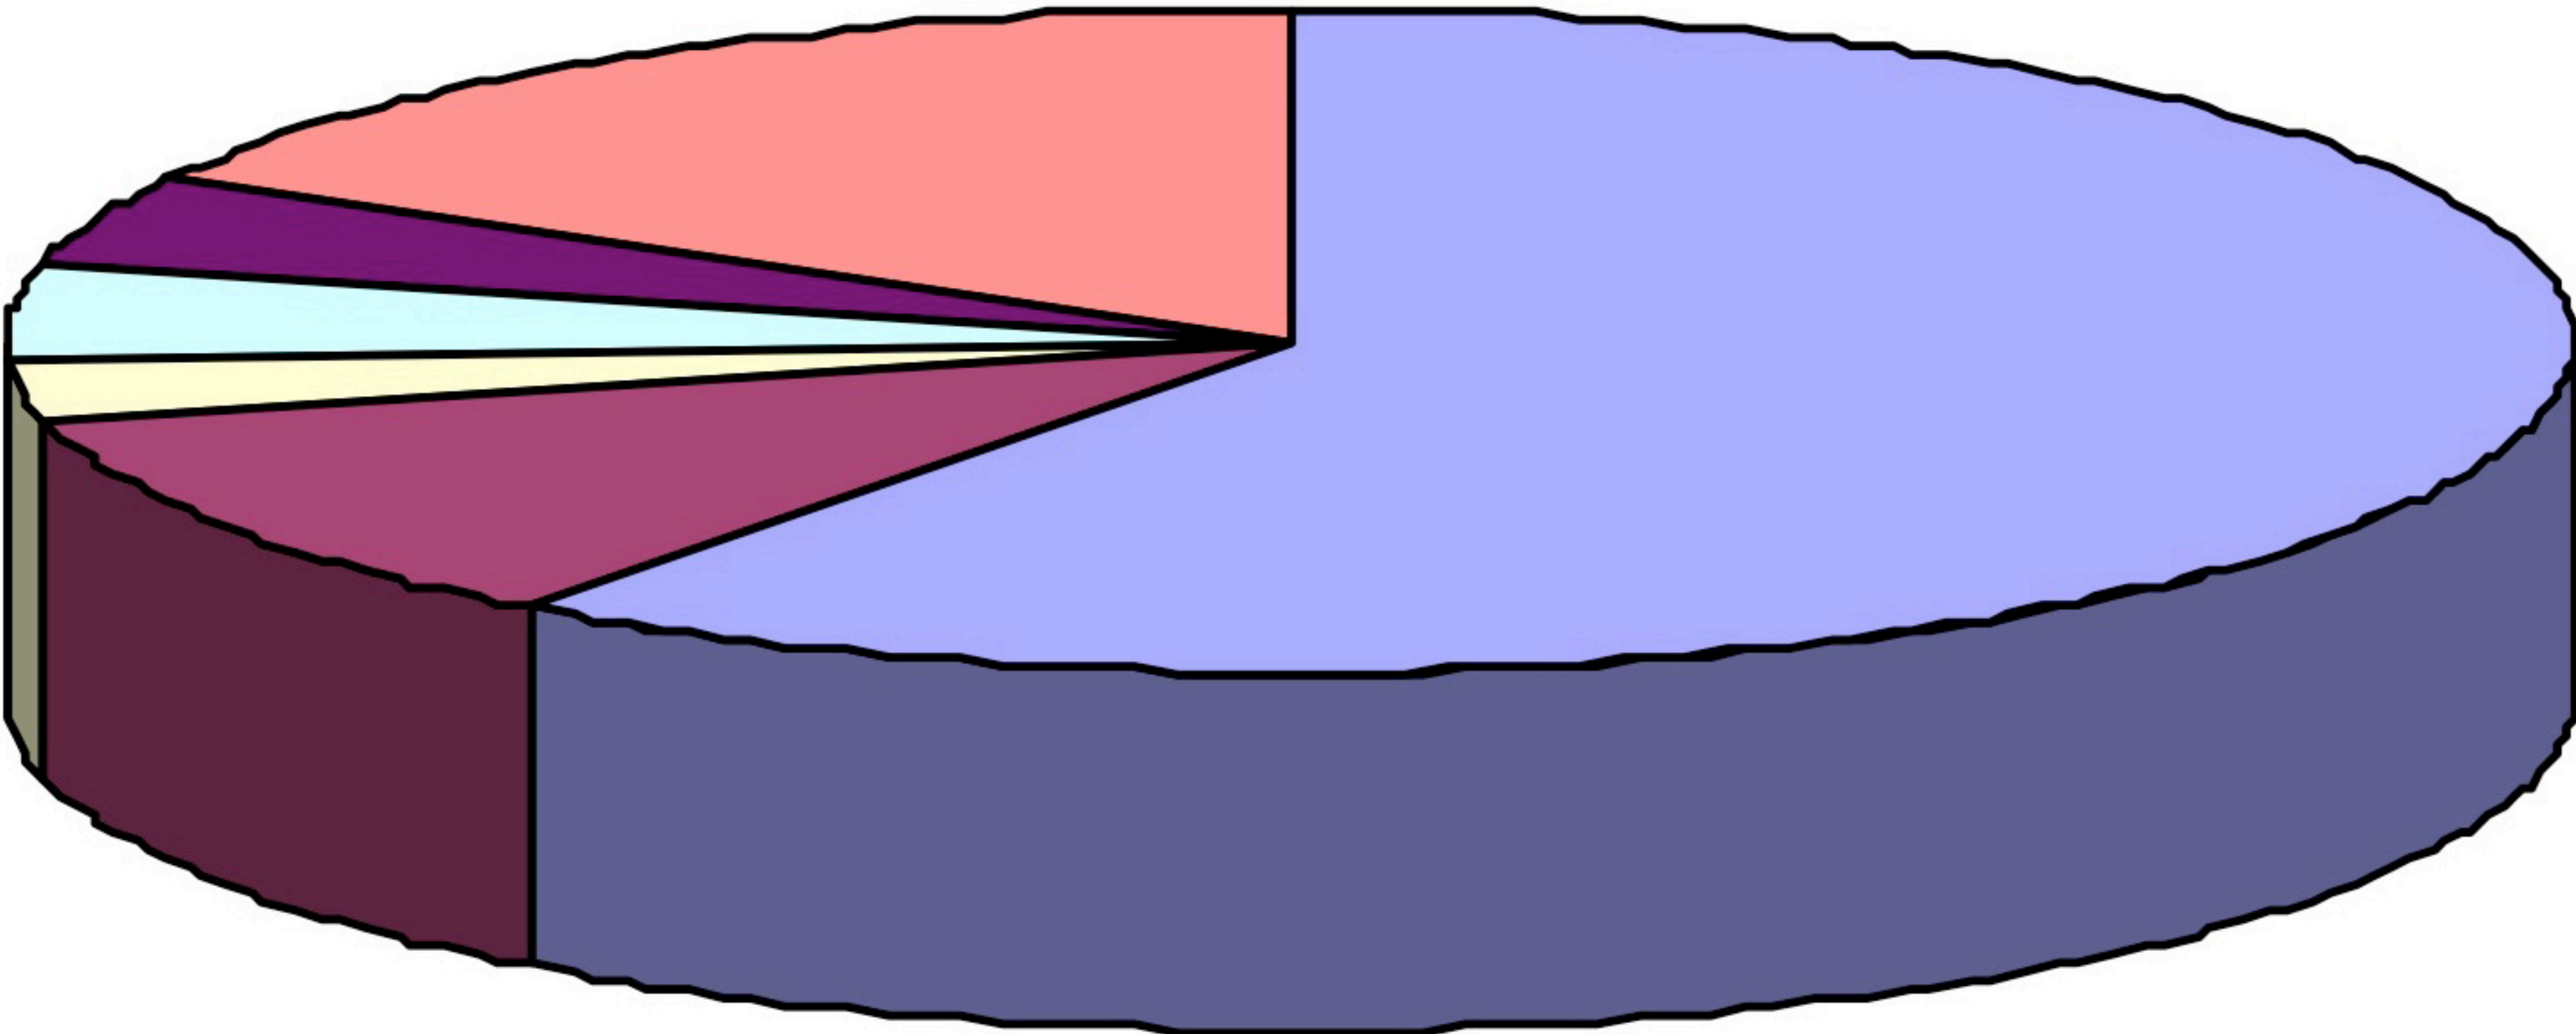

Supplement: MOESM1 [file 9631286]
